# Supplementary material for: Platinum complexes with aggregation-induced emission
Source: Royal Society of Chemistry journal article supplement (doi:10.1039/d4cs00218k), 2024-01-01
Supplement: d4cs00218k1.pdf [file d4cs00218k1.pdf]

## Supporting Information

### Platinum complexes with aggregation-induced emission

Sheng-Yi Yang<sup>†a</sup>, Yingying Chen<sup>†a</sup>, Ryan T. K. KWOK<sup>a\*</sup>, Jacky W. Y. LAM<sup>a\*</sup>, Ben Zhong Tang<sup>a,b\*</sup>

<sup>a</sup> Department of Chemistry, Hong Kong Branch of Chinese National Engineering Research Center for Tissue Restoration and Reconstruction, Division of Life Science, State Key Laboratory of Molecular Neuroscience, and Department of Chemical and Biological Engineering, The Hong Kong University of Science and Technology, Clear Water Bay, Kowloon, Hong Kong 999077, China.

<sup>b</sup> School of Science and Engineering, Shenzhen Institute of Aggregate Science and Technology, The Chinese University of Hong Kong, Shenzhen (CUHK-Shenzhen), Guangdong 518172, China.

<sup>†</sup>These authors contributed equally to this work.

E-mail: [chryan@ust.hk](mailto:chryan@ust.hk); [chjacky@ust.hk](mailto:chjacky@ust.hk); [tangbenz@cuhk.edu.cn](mailto:tangbenz@cuhk.edu.cn).

**Table S1.** Relevant information on reported cyclometallic platinum complexes, including complex types, AIE mechanisms, application fields, aggregation environments, aggregation states, and corresponding references.

| Year | Type of ligands               | AIE mechanism      | Applications     | Aggregation environment                                    | Aggregation state | Ref. |
|------|-------------------------------|--------------------|------------------|------------------------------------------------------------|-------------------|------|
| 2002 | Tridentate ligand             | Pt-Pt interactions | Sensor           | Acetonitrile/diethyl ether                                 | Nanoparticles     | [1]  |
| 2005 | Tridentate ligand             | Pt-Pt interactions | Sensor           | Acetonitrile/diethyl ether                                 | Nanoparticles     | [2]  |
| 2005 | Tridentate ligand             | Pt-Pt interactions | Sensor           | Poly(acrylic acid)/TBAH                                    | Nanoparticles     | [3]  |
| 2006 | Polynuclear                   | Pt-Pt interactions | Sensor           | DMSO                                                       | Nanoparticles     | [4]  |
| 2007 | Tridentate ligand             | Pt-Pt interactions | Sensor           | DMSO                                                       | Gels              | [5]  |
| 2008 | Polynuclear                   | RIM                | /                | Acetonitrile/H <sub>2</sub> O                              | Nanoparticles     | [6]  |
| 2009 | Tridentate ligand             | Pt-Pt interactions | Sensor           | Polyacetylene in methanol                                  | Nanoparticles     | [7]  |
| 2009 | Tridentate ligand             | Pt-Pt interactions | Optoelectronic   | Methanol/H <sub>2</sub> O                                  | Microfibers       | [8]  |
| 2009 | Tridentate ligand             | Pt-Pt interactions | Sensor           | G-quadruplex formation upon K <sup>+</sup> ion binding     | Nanoparticles     | [9]  |
| 2011 | Tridentate ligand             | Pt-Pt interactions | Sensor           | Buffer-CH <sub>3</sub> CN solution / $\alpha$ -glucosidase | Nanoparticles     | [10] |
| 2011 | Polynuclear                   | Pt-Pt interactions | Sensor           | H <sub>2</sub> O                                           | Nanoparticles     | [11] |
| 2011 | Polynuclear                   | RIM                | Stimuli response | Cyclohexane and sonication                                 | Gels              | [12] |
| 2011 | One ligand                    | RIM                | Optoelectronic   | Crystalline                                                | Crystals          | [13] |
| 2010 | Polynuclear                   | RIM                | /                | Acetonitrile/dichloromethane                               | Nanoparticles     | [14] |
| 2011 | Tridentate ligand             | Pt-Pt interactions | Sensor           | Acetone/H <sub>2</sub> O                                   | Nanoparticles     | [15] |
| 2011 | Tridentate ligand             | Pt-Pt interactions | Optoelectronic   | Frozen matrices /thin film                                 | Fibers or gels    | [16] |
| 2010 | Three ligands                 | Other mechanisms   | /                | Solid state                                                | Solids            | [17] |
| 2012 | Heteroleptic bidentate ligand | RDES               | Biological       | THF/H <sub>2</sub> O                                       | Nanoparticles     | [18] |

**Table S1.** Continued.

| Year | Type of ligands               | AIE mechanism      | Applications     | Aggregation environment                         | Aggregation state | Ref. |
|------|-------------------------------|--------------------|------------------|-------------------------------------------------|-------------------|------|
| 2013 | Tridentate ligand             | Pt-Pt interactions | Biological       | H <sub>2</sub> O                                | Nanoparticles     | [19] |
| 2013 | Heteroleptic bidentate ligand | RIM                | /                | Crystalline                                     | Crystals          | [20] |
| 2013 | Tridentate ligand             | Pt-Pt interactions | Biological       | Tris-HCl with ATP                               | Nanoparticles     | [21] |
| 2013 | Polynuclear                   | Pt-Pt interactions | /                | Acetonitrile/H <sub>2</sub> O                   | Nanoparticles     | [22] |
| 2014 | Tridentate ligand             | Pt-Pt interactions | Sensor           | In aqueous buffer solutions                     | Nanoparticles     | [23] |
| 2014 | Tridentate ligand             | RIM                | Sensor           | Methanol/H <sub>2</sub> O                       | Micelles          | [24] |
| 2014 | Tridentate ligand             | RIM                | /                | Methanol/H <sub>2</sub> O                       | Nanoparticles     | [25] |
| 2014 | Three ligands                 | RIM                | Optoelectronic   | THF/H <sub>2</sub> O                            | Nanoparticles     | [26] |
| 2014 | Heteroleptic bidentate ligand | RIM                | Biological       | Dichloromethane/hexane                          | Nanoparticles     | [27] |
| 2014 | Six ligands                   | RIM                | Biological       | DMSO/PBS                                        | Nanoparticles     | [28] |
| 2014 | Six ligands                   | RIM                | Biological       | TPS-CH <sub>2</sub> N <sub>3</sub> / DMSO/PIPES | Nanoparticles     | [29] |
| 2015 | Tridentate ligand             | Pt-Pt interactions | /                | Toluene                                         | Nanoparticles     | [30] |
| 2015 | Six ligands                   | RIM                | Biological       | Incubated with GSH (100 mM)                     | Nanoparticles     | [31] |
| 2015 | Tridentate ligand             | Pt-Pt interactions | /                | 1,4-Dioxane/H <sub>2</sub> O                    | Nanoparticles     | [32] |
| 2016 | Polynuclear                   | Other mechanisms   | /                | Benzene                                         | Gels              | [33] |
| 2016 | Three ligands                 | RIM                | Stimuli response | Methanol/H <sub>2</sub> O                       | Nanoparticles     | [34] |
| 2017 | Tridentate ligand             | Pt-Pt interactions | Optoelectronic   | Dichloromethane/ H <sub>2</sub> O               | Nanoparticles     | [35] |
| 2017 | Tridentate ligand             | Pt-Pt interactions | /                | Acetonitrile/H <sub>2</sub> O                   | Nanoparticles     | [36] |
| 2017 | Tridentate ligand             | Pt-Pt interactions | Sensor           | Hexa-arginine in PBS buffer                     | Nanoparticles     | [37] |
| 2017 | Three ligands                 | RIM                | Optoelectronic   | Acetonitrile/H <sub>2</sub> O                   | Nanoparticles     | [38] |
| 2018 | Heteroleptic bidentate ligand | Pt-Pt interactions | /                | THF/acetonitrile                                | Nanoparticles     | [39] |

**Table S1. Continued.**

| Year | Type of ligands               | AIE mechanism      | Applications     | Aggregation environment          | Aggregation state             | Ref. |
|------|-------------------------------|--------------------|------------------|----------------------------------|-------------------------------|------|
| 2018 | Polynuclear                   | Pt-Pt interactions | /                | DMSO/H <sub>2</sub> O            | Nanoparticles                 | [40] |
| 2018 | Tridentate ligand             | Pt-Pt interactions | /                | THF                              | Nanoparticles                 | [41] |
| 2018 | Tridentate ligand             | RIM                | /                | Alcohols and dodecane            | Gels                          | [42] |
| 2018 | Heteroleptic bidentate ligand | RIM                | Biological       | Dichloromethane/hexane           | Nanoparticles                 | [43] |
| 2018 | One ligand                    | RIM                | Optoelectronic   | THF/H <sub>2</sub> O             | Nanoparticles                 | [44] |
| 2018 | Tridentate ligand             | Pt-Pt interactions | Biological       | Acetonitrile/H <sub>2</sub> O    | Nanoparticles                 | [45] |
| 2018 | Three ligands                 | RIM                | Optoelectronic   | THF/H <sub>2</sub> O             | Nanoparticles                 | [46] |
| 2019 | Three ligands                 | Pt-Pt interactions | Sensor           | Chloroform/hexane                | Gels                          | [47] |
| 2019 | Heteroleptic bidentate ligand | Pt-Pt interactions | Stimuli response | Dichloromethane                  | Metallomesogens               | [48] |
| 2019 | Polynuclear                   | RIM                | /                | Crystalline                      | Crystals                      | [49] |
| 2019 | Tridentate ligand             | Pt-Pt interactions | Sensor           | PBS buffer                       | Nanoparticles                 | [50] |
| 2019 | One ligand                    | Other mechanisms   | /                | Chloroform                       | Solution                      | [51] |
| 2019 | Heteroleptic bidentate ligand | RDES               | Biological       | THF/H <sub>2</sub> O             | Nanoparticles                 | [52] |
| 2019 | Polynuclear                   | RIM                | /                | Crystalline                      | Crystals                      | [53] |
| 2019 | Polynuclear                   | RIM                | /                | Solid state                      | Solids                        | [54] |
| 2019 | Tridentate ligand             | RIM                | /                | DMF/H <sub>2</sub> O             | Nanoparticles                 | [55] |
| 2019 | Homoleptic bidentate ligand   | Pt-Pt interactions | Sensor           | Dichloromethane/Hg <sup>2+</sup> | Liquid crystalline mesophases | [56] |
| 2020 | Four ligands                  | RIM                | Biological       | DMSO/H <sub>2</sub> O            | Nanoparticles                 | [57] |
| 2020 | Tridentate ligand             | Pt-Pt interactions | Sensor           | Solid state                      | Liquid crystals               | [58] |
| 2019 | Tridentate ligand             | RIM                | /                | THF/H <sub>2</sub> O             | Micelles                      | [59] |
| 2020 | Heteroleptic bidentate ligand | RIM                | Optoelectronic   | THF/H <sub>2</sub> O             | Nanoparticles                 | [60] |
| 2020 | Three ligands                 | RIM                | Stimuli response | THF/H <sub>2</sub> O             | Nanoparticles                 | [61] |
| 2020 | Four ligands                  | Other mechanisms   | /                | Solid state                      | Solids                        | [62] |

**Table S1. Continued.**

| Year | Type of ligands               | AIE mechanism                                 | Applications     | Aggregation environment       | Aggregation state      | Ref. |
|------|-------------------------------|-----------------------------------------------|------------------|-------------------------------|------------------------|------|
| 2020 | Polynuclear                   | RIM                                           | Optoelectronic   | Crystal or neat film          | Crystal or solid state | [63] |
| 2020 | Heteroleptic bidentate ligand | Other mechanisms                              | /                | Liquid crystal                | Liquid crystal         | [64] |
| 2020 | Three ligands                 | RCSD                                          | Optoelectronic   | THF/H <sub>2</sub> O          | Nanoparticles          | [65] |
| 2020 | Tridentate ligand             | RIM                                           | Stimuli response | THF/H <sub>2</sub> O          | Nanoparticles          | [66] |
| 2021 | Polynuclear                   | Other mechanisms                              | Optoelectronic   | THF/H <sub>2</sub> O          | Nanoparticles          | [67] |
| 2021 | Homoleptic bidentate ligand   | Pt-Pt interactions                            | Biological       | THF/H <sub>2</sub> O          | Metallomesogens        | [68] |
| 2021 | Polynuclear                   | Pt-Pt interactions                            | Biological       | ct-DNA in Tris-HCl buffer     | Nanoparticles          | [69] |
| 2021 | Heteroleptic bidentate ligand | RIM                                           | Sensor           | Acetonitrile/H <sub>2</sub> O | Nanoparticles          | [70] |
| 2021 | Polynuclear                   | Other mechanisms                              | Optoelectronic   | Acetonitrile/H <sub>2</sub> O | Nanoparticles          | [71] |
| 2021 | One ligand                    | Other mechanisms                              | /                | Crystalline                   | Crystals               | [72] |
| 2021 | Tridentate ligand             | Pt-Pt interactions                            | Biological       | RNA in PBS buffer             | Nanoparticles          | [73] |
| 2021 | Three ligands                 | RIM                                           | Biological       | THF/H <sub>2</sub> O          | Nanoparticles          | [74] |
| 2021 | Heteroleptic bidentate ligand | RIM                                           | /                | Dichloromethane/hexane        | Nanoparticles          | [75] |
| 2021 | Polynuclear                   | Other mechanisms                              | Optoelectronic   | Powder                        | Powders                | [76] |
| 2021 | Three ligands                 | Restrained <i>D</i> <sub>2d</sub> deformation | Optoelectronic   | THF/H <sub>2</sub> O          | Nanoparticles          | [77] |
| 2022 | Heteroleptic bidentate ligand | RIM                                           | Sensor           | Acetonitrile/H <sub>2</sub> O | Nanoparticles          | [78] |
| 2022 | Polynuclear                   | Other mechanisms                              | Optoelectronic   | Solid state                   | Powders                | [79] |
| 2022 | Three ligands                 | RCSD                                          | Optoelectronic   | THF/H <sub>2</sub> O          | Nanoparticles          | [80] |
| 2022 | Tridentate ligand             | RIM                                           | Stimuli response | THF/H <sub>2</sub> O          | Nanoparticles          | [81] |
| 2022 | Tridentate ligand             | Pt-Pt interactions                            | /                | Chloroform                    | Solutions              | [82] |

**Table S1.** Continued.

| Year | Type of ligands               | AIE mechanism          | Applications                  | Aggregation environment       | Aggregation state | Ref. |
|------|-------------------------------|------------------------|-------------------------------|-------------------------------|-------------------|------|
| 2022 | Tridentate ligand             | Pt-Pt interactions     | Biological                    | Acetonitrile/H <sub>2</sub> O | Nanoparticles     | [83] |
| 2022 | Tridentate ligand             | RIM                    | Biological                    | Ethanol/H <sub>2</sub> O      | Nanoparticles     | [84] |
| 2022 | One ligand                    | RIM                    | /                             | DMSO/H <sub>2</sub> O         | Nanoparticles     | [85] |
| 2022 | Three ligands                 | Restrained deformation | $D_{2d}$<br>Sensor            | THF/H <sub>2</sub> O          | Nanoparticles     | [86] |
| 2023 | Heteroleptic bidentate ligand | RIM                    | /                             | Acetonitrile/H <sub>2</sub> O | Nanoparticles     | [87] |
| 2023 | Tridentate ligand             | Pt-Pt interactions     | /                             | Dichloromethane/toluene       | Nanoparticles     | [88] |
| 2023 | Polynuclear                   | RIM                    | Optoelectronic                | Solid state                   | Solids            | [89] |
| 2023 | Heteroleptic bidentate ligand | RIM                    | Optoelectronic                | THF/H <sub>2</sub> O          | Nanoparticles     | [90] |
| 2023 | Polynuclear                   | Pt-Pt interactions     | Biological                    | NaCl or KCl solution          | Nanoparticles     | [91] |
| 2023 | Tridentate ligand             | RIM                    | /                             | Acetonitrile/H <sub>2</sub> O | Nanoparticles     | [92] |
| 2023 | Heteroleptic bidentate ligand | RIM                    | Sensor                        | Acetonitrile/H <sub>2</sub> O | Nanoparticles     | [93] |
| 2023 | Homoleptic bidentate ligand   | RMCT                   | Optoelectronic/<br>Biological | DMSO/H <sub>2</sub> O         | Nanoparticles     | [94] |

**Table S2.** Comparison table of three AIE mechanisms of the platinum complexes.

| AIE mechanism                                                                  | Type of ligands              | Solution state                                                                                                                                                                                                                                                                                                                                                                                                                                                                                                                                                                        | Aggregation state                                                                                                                                                                                                                                                                                                                                                                                                                                                                                    |
|--------------------------------------------------------------------------------|------------------------------|---------------------------------------------------------------------------------------------------------------------------------------------------------------------------------------------------------------------------------------------------------------------------------------------------------------------------------------------------------------------------------------------------------------------------------------------------------------------------------------------------------------------------------------------------------------------------------------|------------------------------------------------------------------------------------------------------------------------------------------------------------------------------------------------------------------------------------------------------------------------------------------------------------------------------------------------------------------------------------------------------------------------------------------------------------------------------------------------------|
| <b>Restriction of coordination skeletal deformation</b>                        | Three ligands                | <p>(1) Monodentate ligands to rotate freely around the single bonds.</p> <p>(2) The <math>S_0/S_1</math> minimal energy conical intersection (MECI) could be easily reached upon photoexcitation since there was almost no barrier to overcome the decay from the Frank–Condon point to MECI.</p> <p>(3) Coordination skeletal deformation.</p>                                                                                                                                                                                                                                       | <p>(1) The coordination skeletal deformation would be greatly restricted to increase the energy gap of MECI between <math>S_1</math> and <math>S_0</math> and decrease the rate of IC.</p> <p>(2) The planar geometry of <math>T_1</math> minimum was very similar to that of <math>S_0</math> and similar to that of <math>S_1</math> at the Frank–Condon point, which would benefit the ISC from <math>S_1</math> to <math>T_1</math> to promote the emission from the <math>T_1</math> state.</p> |
| <b>Restrained <math>D_{2d}</math> deformation of the coordinating skeleton</b> | Three ligands                | <p>(1) Monodentate ligands to rotate freely around the single bonds.</p> <p>(2) The <math>S_0/S_1</math> minimal MECI could be easily reached upon photoexcitation since there was almost no barrier to overcome the decay from the Frank–Condon point to MECI.</p> <p>(3) The square-planar (<math>D_{4h}</math>) coordinating skeleton of Pt(II) complexes with mono-dental ligands can undergo deformation to form a tetrahedron (<math>T_d</math>) skeleton in their excited states to induce nonradiative decay processes and quench the emission signal in dilute solution.</p> | <p>The deformation of the square-planar (<math>D_{4h}</math>) coordinating skeleton of the Pt(II) center to tetrahedron (<math>T_d</math>) can be effectively restrained to facilitate radiative decay of the excited states.</p>                                                                                                                                                                                                                                                                    |
| <b>Restriction of molecular configuration transformation</b>                   | Homoleptic bidentate ligands | <p>(1) The monomeric molecules undergo substantial molecular configuration transformation in <math>S_1</math> and <math>T_1</math> states from the square-planar one to the tetrahedral one caused by the significant metal center d–d transitions.</p> <p>(2) The effortless reaching of the <math>S_0/S_1</math> MECI points from the Frank–Condon points, leading to the nonradiative transitions of <math>S_1</math> and <math>T_1</math> states.</p>                                                                                                                             | <p>The intermolecular interactions and the molecular packings, the molecular configuration transformation in excited states at the solid or crystal states can be efficiently restrained, obtaining emissions at aggregated states.</p>                                                                                                                                                                                                                                                              |

## References

1. V. W.-W. Yam, K. M.-C. Wong and N. Zhu, *J. Am. Chem. Soc.*, 2002, **124**, 6506-6507.
2. Z. Jiang, J. Wang, T. Gao, J. Ma, Z. Liu and R. Chen, *ACS Appl. Mater. Interfaces*, 2020, **12**, 9520-9527.
3. C. Yu, K. M.-C. Wong, K. H.-Y. Chan and V. W.-W. Yam, *Angew. Chem. Int. Ed.*, 2005, **44**, 791-794.
4. V. W.-W. Yam, K. H.-Y. Chan, K. M.-C. Wong and B. W.-K. Chu, *Angew. Chem. Int. Ed.*, 2006, **45**, 6169-6173.
5. A. Y.-Y. Tam, K. M.-C. Wong, G. Wang and V. W.-W. Yam, *Chem. Commun.*, 2007, 2028-2030.
6. M.-X. Zhu, W. Lu, N. Zhu and C.-M. Che, *Chem.–Eur. J.*, 2008, **14**, 9736-9746.
7. K. H.-Y. Chan, J. W.-Y. Lam, K. M.-C. Wong, B.-Z. Tang and V. W.-W. Yam, *Chem.–Eur. J.*, 2009, **15**, 2328-2334.
8. W. Lu, Y. Chen, V. A. L. Roy, S. S.-Y. Chui and C.-M. Che, *Angew. Chem. Int. Ed.*, 2009, **48**, 7621-7625.
9. C. Yu, K. H.-Y. Chan, K. M.-C. Wong and V. W.-W. Yam, *Chem. Commun.*, 2009, 3756-3758.
10. C. Y.-S. Chung, K. H.-Y. Chan and V. W.-W. Yam, *Chem. Commun.*, 2011, **47**, 2000-2002.
11. Y. Hu, K. H.-Y. Chan, C. Y.-S. Chung and V. W.-W. Yam, *Dalton Trans.*, 2011, **40**, 12228-12234.
12. N. Komiya, T. Muraoka, M. Iida, M. Miyanaga, K. Takahashi and T. Naota, *J. Am. Chem. Soc.*, 2011, **133**, 16054-16061.
13. N. Komiya, M. Okada, K. Fukumoto, D. Jomori and T. Naota, *J. Am. Chem. Soc.*, 2011, **133**, 6493-6496.
14. S. C. F. Kui, Y.-C. Law, G. S. M. Tong, W. Lu, M.-Y. Yuen and C.-M. Che, *Chem. Sci.*, 2011, **2**, 221-228.
15. C. Po, A. Y.-Y. Tam, K. M.-C. Wong and V. W.-W. Yam, *J. Am. Chem. Soc.*, 2011, **133**, 12136-12143.
16. C. A. Strassert, C.-H. Chien, M. D. Galvez Lopez, D. Kourkoulos, D. Hertel, K. Meerholz and L. De Cola, *Angew. Chem. Int. Ed.*, 2011, **50**, 946-950.
17. J. R. Berenguer, E. Lalinde, M. T. Moreno, S. Sánchez and J. Torroba, *Inorg. Chem.*, 2012, **51**, 11665-11679.
18. S. Liu, H. Sun, Y. Ma, S. Ye, X. Liu, X. Zhou, X. Mou, L. Wang, Q. Zhao and W. Huang, *J. Mater. Chem.*, 2012, **22**, 22167-22173.
19. C. Y.-S. Chung, S. P.-Y. Li, M.-W. Louie, K. K.-W. Lo and V. W.-W. Yam, *Chem. Sci.*, 2013, **4**, 2453-2462.
20. N. Komiya, T. Kashiwabara, S. Iwata and T. Naota, *J. Organomet. Chem.*, 2013, **738**, 66-75.
21. M. C.-L. Yeung and V. W.-W. Yam, *Chem. Sci.*, 2013, **4**, 2928-2935.
22. S. Yu-Lut Leung and V. Wing-Wah Yam, *Chem. Sci.*, 2013, **4**, 4228-4234.
23. C. Y. S. Chung and V. W. W. Yam, *Chem.–Eur. J.*, 2014, **20**, 13016-13027.

24. H. Honda, J. Kuwabara and T. Kanbara, *J. Organomet. Chem.*, 2014, **772-773**, 139-142.
25. H. Honda, Y. Ogawa, J. Kuwabara and T. Kanbara, *Eur. J. Inorg. Chem.*, 2014, 1865-1869.
26. Y. Li, D. P.-K. Tsang, C. K.-M. Chan, K. M.-C. Wong, M.-Y. Chan and V. W.-W. Yam, *Chem.–Eur. J.*, 2014, **20**, 13710-13715.
27. S. S. Pasha, P. Alam, S. Dash, G. Kaur, D. Banerjee, R. Chowdhury, N. Rath, A. Roy Choudhury and I. R. Laskar, *RSC Adv.*, 2014, **4**, 50549-50553.
28. Y. Yuan, Y. Chen, B. Z. Tang and B. Liu, *Chem. Commun.*, 2014, **50**, 3868-3870.
29. Y. Yuan, R. T. K. Kwok, B. Z. Tang and B. Liu, *J. Am. Chem. Soc.*, 2014, **136**, 2546-2554.
30. T. Ikeda, M. Takayama, J. Kumar, T. Kawai and T. Haino, *Dalton Trans.*, 2015, **44**, 13156-13162.
31. Y. Yuan, C.-J. Zhang and B. Liu, *Chem. Commun.*, 2015, **51**, 8626-8629.
32. A. Aliprandi, M. Mauro and L. De Cola, *Nat. Chem.*, 2016, **8**, 10-15.
33. F. Gou, J. Cheng, X. Zhang, G. Shen, X. Zhou and H. Xiang, *Eur. J. Inorg. Chem.*, 2016, 4862-4866.
34. S. S. Pasha, P. Alam, A. Sarmah, R. K. Roy and I. R. Laskar, *RSC Adv.*, 2016, **6**, 87791-87795.
35. S. Carrara, A. Aliprandi, C. F. Hogan and L. De Cola, *J. Am. Chem. Soc.*, 2017, **139**, 14605-14610.
36. H.-K. Cheng, M. C.-L. Yeung and V. W.-W. Yam, *ACS Appl. Mater. Interfaces*, 2017, **9**, 36220-36228.
37. A. S.-Y. Law, M. C.-L. Yeung and V. W.-W. Yam, *ACS Appl. Mater. Interfaces*, 2017, **9**, 41143-41150.
38. R. Liu, S. Zhu, J. Lu, H. Shi and H. Zhu, *Dyes Pigments*, 2017, **147**, 291-299.
39. Y. Ai, M. Ng, E. Y.-H. Hong, A. K.-W. Chan, Z.-W. Wei, Y. Li and V. W.-W. Yam, *Chem.–Eur. J.*, 2018, **24**, 11611-11618.
40. H.-L. Au-Yeung, S. Y.-L. Leung and V. W.-W. Yam, *Chem. Commun.*, 2018, **54**, 4128-4131.
41. S. Fang, S. Y. L. Leung, Y. Li and V. W. W. Yam, *Chem.–Eur. J.*, 2018, **24**, 15596-15602.
42. T. Ikeda, K. Hirano and T. Haino, *Mater. Chem. Front.*, 2018, **2**, 468-474.
43. S. S. Pasha, L. Fageria, C. Climent, N. P. Rath, P. Alemany, R. Chowdhury, A. Roy and I. R. Laskar, *Dalton Trans.*, 2018, **47**, 4613-4624.
44. J. Song, M. Wang, X. Zhou and H. Xiang, *Chem.–Eur. J.*, 2018, **24**, 7128-7132.
45. J. Wu, Y. Li, C. Tan, X. Wang, Y. Zhang, J. Song, J. Qu and W.-Y. Wong, *Chem. Commun.*, 2018, **54**, 11144-11147.
46. J. Zhao, Z. Feng, D. Zhong, X. Yang, Y. Wu, G. Zhou and Z. Wu, *Chem. Mater.*, 2018, **30**, 929-946.
47. Y. Ai, Y. Li, H. L.-K. Fu, A. K.-W. Chan and V. W.-W. Yam, *Chem.–Eur. J.*, 2019, **25**, 5251-5258.
48. C. Cuerva, J. A. Campo, M. Cano and C. Lodeiro, *Chem.–Eur. J.*, 2019, **25**, 12046-12051.
49. M. Ikeshita, M. Ito and T. Naota, *Eur. J. Inorg. Chem.*, 2019, 3561-3571.
50. A. S.-Y. Law, L. C.-C. Lee, M. C.-L. Yeung, K. K.-W. Lo and V. W.-W. Yam, *J. Am. Chem. Soc.*, 2019, **141**, 18570-18577.

51. N. H.-T. Le, R. Inoue, S. Kawamorita, N. Komiya and T. Naota, *Inorg. Chem.*, 2019, **58**, 9076-9084.
52. S. Lin, H. Pan, L. Li, R. Liao, S. Yu, Q. Zhao, H. Sun and W. Huang, *J. Mater. Chem. C*, 2019, **7**, 7893-7899.
53. L. Qu, C. Li, G. Shen, F. Gou, J. Song, M. Wang, X. Xu, X. Zhou and H. Xiang, *Mater. Chem. Front.*, 2019, **3**, 1199-1208.
54. J. Song, M. Wang, X. Xu, L. Qu, X. Zhou and H. Xiang, *Dalton Trans.*, 2019, **48**, 4420-4428.
55. S. Wang, W. Li, Y. Yu, J. Liu and C. Zhang, *Acta Physico-Chimica Sinica*, 2019, **35**, 1276-1281.
56. C. Cuerva, J. A. Campo, M. Cano, M. Caño-García, J. M. Otón and C. Lodeiro, *Dyes Pigments*, 2020, **175**, 108098.
57. B. Guo, M. Wu, Q. Shi, T. Dai, S. Xu, J. Jiang and B. Liu, *Chem. Mater.*, 2020, **32**, 4681-4691.
58. X. Hao, B. Xiong, M. Ni, B. Tang, Y. Ma, H. Peng, X. Zhou, I. I. Smalyukh and X. Xie, *ACS Appl. Mater. Interfaces*, 2020, **12**, 53058-53066.
59. T. Hirao, H. Tsukamoto, T. Ikeda and T. Haino, *Chem. Commun.*, 2020, **56**, 1137-1140.
60. Z. Jiang, J. Wang, T. Gao, J. Ma, Z. Liu and R. Chen, *ACS Appl. Mater. Interfaces*, 2020, **12**, 9520-9527.
61. M. Martínez-Junquera, R. Lara, E. Lalinde and M. T. Moreno, *J. Mater. Chem. C*, 2020, **8**, 7221-7233.
62. W. J. Mullin, H. Qin, T. Mani, P. Müller, M. J. Panzer and S. W. Thomas, *Chem. Commun.*, 2020, **56**, 6854-6857.
63. X. Wu, D.-G. Chen, D. Liu, S.-H. Liu, S.-W. Shen, C.-I. Wu, G. Xie, J. Zhou, Z.-X. Huang, C.-Y. Huang, S.-J. Su, W. Zhu and P.-T. Chou, *J. Am. Chem. Soc.*, 2020, **142**, 7469-7479.
64. B. Yang, H. Ni, H. Wang, Y. Hu, K. Luo and W. Yu, *J Phys. Chem. C*, 2020, **124**, 23879-23887.
65. X. Yang, L. Yue, Y. Yu, B. Liu, J. Dang, Y. Sun, G. Zhou, Z. Wu and W.-Y. Wong, *Adv. Opt. Mater.*, 2020, **8**, 2000079.
66. S. Zhu, J. Hu, S. Zhai, Y. Wang, Z. Xu, R. Liu and H. Zhu, *Inorg. Chem. Front.*, 2020, **7**, 4677-4686.
67. X. Chen, Y. Sun, X. Zhao, X. Deng, X. Yang, Y. Sun, G. Zhou and Z. Wu, *Mater. Chem. Front.*, 2021, **5**, 4160-4173.
68. C. Cuerva, J. Fernández-Lodeiro, M. Cano, J. L. Capelo-Martínez and C. Lodeiro, *Nano Res.*, 2021, **14**, 245-254.
69. B. Das and P. Gupta, *Dalton Trans.*, 2021, **50**, 10225-10236.
70. L. Di, Z. Xia, H. Wang, Y. Xing and Z. Yang, *Sensor. Actuat. B-Chem.*, 2021, **326**, 128987.
71. Z.-L. Gong, K. Tang and Y.-W. Zhong, *Inorg. Chem.*, 2021, **60**, 6607-6615.
72. R. Inoue, T. Naota and M. Ehara, *Chem. –Asian J.*, 2021, **16**, 3129-3140.
73. A. S.-Y. Law, L. C.-C. Lee, K. K.-W. Lo and V. W.-W. Yam, *J. Am. Chem. Soc.*, 2021, **143**, 5396-5405.
74. M. Martínez-Junquera, E. Lalinde, M. T. Moreno, E. Alfaro-Arnedo, I. P. López, I. M. Larráyoiz and J. G. Pichel, *Dalton Trans.*, 2021, **50**, 4539-4554.

75. W. Tao, Y. Chen, L. Lu and C. Liu, *Tetrahedron Lett.*, 2021, **66**, 152802.
76. L. Wang, H. Xiao, L. Qu, J. Song, W. Zhou, X. Zhou, H. Xiang and Z.-X. Xu, *Inorg. Chem.*, 2021, **60**, 13557-13566.
77. H. Yang, H. Li, L. Yue, X. Chen, D. Song, X. Yang, Y. Sun, G. Zhou and Z. Wu, *J. Mater. Chem. C*, 2021, **9**, 2334-2349.
78. L. Di, Z. Wang, Z. Yu, Q. Cao, H. Wang, Y. Xing, Z. Yang and Z. Xia, *Dyes Pigments*, 2022, **205**, 110582.
79. J. Song, H. Xiao, L. Fang, L. Qu, X. Zhou, Z.-X. Xu, C. Yang and H. Xiang, *J. Am. Chem. Soc.*, 2022, **144**, 2233-2244.
80. Y. Sun, C. Zhu, S. Liu, W. Wang, X. Chen, G. Zhou, X. Yang and W.-Y. Wong, *Chem. Eng. J.*, 2022, **449**, 137457.
81. H.-H. Zhang, S.-X. Wu, Y.-Q. Wang, T.-G. Xie, S.-S. Sun, Y.-L. Liu, L.-Z. Han, X.-P. Zhang and Z.-F. Shi, *Dyes Pigments*, 2022, **197**, 109857.
82. E. K.-H. Wong, M. H.-Y. Chan, W. K. Tang, M.-Y. Leung and V. W.-W. Yam, *J. Am. Chem. Soc.*, 2022, **144**, 5424-5434.
83. B. Li, Y. Wang, M. H.-Y. Chan, M. Pan, Y. Li and V. W.-W. Yam, *Angew. Chem. Int. Ed.*, 2022, **61**, e202210703.
84. Z. Fang, D. Chen, J. Xu, J. Wang, S. Li, X. Tian, Y. Tian and Q. Zhang, *Anal. Chem.*, 2022, **94**, 14769-14777.
85. H.-H. Zhang, J. Jing, G. Xu, Y.-X. Song, S.-X. Wu, X.-H. Chen, D.-S. Zhang, X.-P. Zhang and Z.-F. Shi, *Heliyon*, 2022, **8**, e11358.
86. C. Li, L. Xu, X. Chen, Z. Chi, B. Xu and J. Zhao, *Dyes Pigments*, 2023, **209**, 110912.
87. M.-J. Kim, M. Chae, M. Ahn and K.-R. Wee, *Adv. Opt. Mater.*, 2023, **11**, 2202983.
88. N. Zhou, C. Zou, S. Suo, Y. Liu, J. Lin, X. Zhang, M. Shi, X. Chang and W. Lu, *Dalton Trans.*, 2023, **52**, 5503-5513.
89. J. Song, H. Xiao, B. Zhang, L. Qu, X. Zhou, P. Hu, Z.-X. Xu and H. Xiang, *Angew. Chem. Int. Ed.*, 2023, **62**, e202302011.
90. D. Tauchi, T. Koida, Y. Nojima, M. Hasegawa, Y. Mazaki, A. Inagaki, K.-i. Sugiura, Y. Nagaya, K. Tsubaki, T. Shiga, Y. Nagata and H. Nishikawa, *Chem. Commun.*, 2023, **59**, 4004-4007.
91. S. T. Borah, B. Das, P. Biswas, A. I. Mallick and P. Gupta, *Dalton Trans.*, 2023, **52**, 2282-2292.
92. A. Lázaro, R. Bosque, J. S. Ward, K. Rissanen, M. Crespo and L. Rodríguez, *Inorg. Chem.*, 2023, **62**, 2000-2012.
93. Y. Yan, W. Jia, L. Zhang and C. Liu, *Dyes Pigments*, 2023, **220**, 111719.
94. J. Wu, B. Xu, Y. Xu, L. Yue, J. Chen, G. Xie and J. Zhao, *Inorg. Chem.*, 2023, **62**, 19142-19152.
